# Supplementary material for: A perovskite cell with a record-high-Voc of 1.61 V based on solvent annealed CH3NH3PbBr3/ICBA active layer
Source: Royal Society of Chemistry journal article supplement (doi:10.1039/c5nr07739g), 2016-01-01
Supplement: c5nr07739g1.pdf [file c5nr07739g1.pdf]

## Electronic Supporting Information

### Low temperature processed solar cell with record-high-Voc of 1.61 V and FF of 0.77 based on solvent annealed CH<sub>3</sub>NH<sub>3</sub>PbBr<sub>3</sub>/ICBA active layer

Chun-Guey Wu<sup>a,b,\*</sup>, Chien-Hung Chiang<sup>b</sup>, Sheng Hsiung Chang<sup>b</sup>

<sup>a</sup>Department of Chemistry and <sup>b</sup>Research Center for New Generation Photovoltaics, National Central University, Jhong-Li, 32001, Taiwan, ROC.

E-mail address of Professor C. G. Wu: t610002@cc.ncu.edu.tw

Table S1: Curve fitting parameters of normalized time-resolved photoluminescence.

| Sample                                                                            | $A_{NR}$ | $\tau_{NR}$ (ns) | $A_R$ | $\tau_P$ (ns) |
|-----------------------------------------------------------------------------------|----------|------------------|-------|---------------|
| CH <sub>3</sub> NH <sub>3</sub> PbBr <sub>3</sub>                                 | 0.39     | 2.05             | 0.61  | 4.66          |
| CH <sub>3</sub> NH <sub>3</sub> PbBr <sub>3</sub> /ICBA without solvent annealing | 0.32     | 2.73             | 0.68  | 8.83          |
| CH <sub>3</sub> NH <sub>3</sub> PbBr <sub>3</sub> /ICBA with solvent annealing    | 0.83     | 0.75             | 0.17  | 1.32          |

$A_{NR}$  is the normalized amplitude of non-radiative exciton annihilation.

$A_R$  is the normalized amplitude of radiative excitons.

$\tau_{NR}$  is the lifetime for the non-radiative exciton annihilation.

$\tau_R$  is the radiative exciton lifetime.

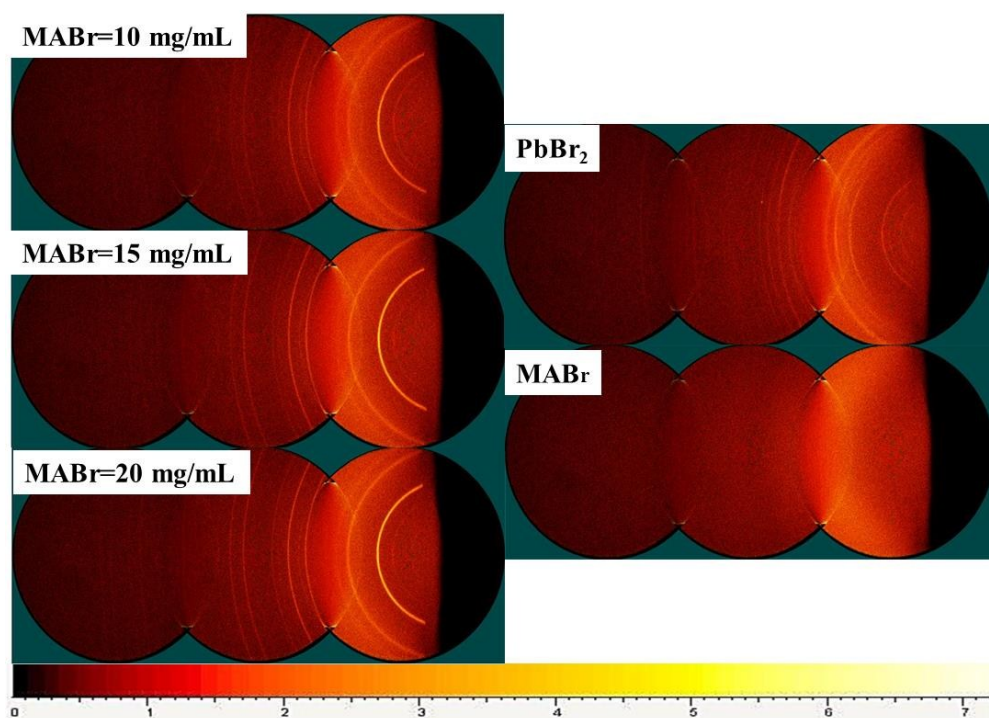

Figure S1: The origin 2D-XRD pattern of  $\text{CH}_3\text{NH}_3\text{PbBr}_3$  films prepared with a two-step method and the starting materials.

The origin 2D-XRD data for  $\text{CH}_3\text{NH}_3\text{PbBr}_3$  films prepared with various concentration of MABr/IPA as well as the starting materials (MABr and  $\text{PbBr}_2$ ) were displayed in Figure S1. The photos proved that the quality of  $\text{CH}_3\text{NH}_3\text{PbBr}_3$  film is very sensitive to the concentration of MABr/IPA used in the second step of the two-step method. Crystalline film with pure phase can be obtained by fine tune the concentration and quantity of each component as well as the spin program.

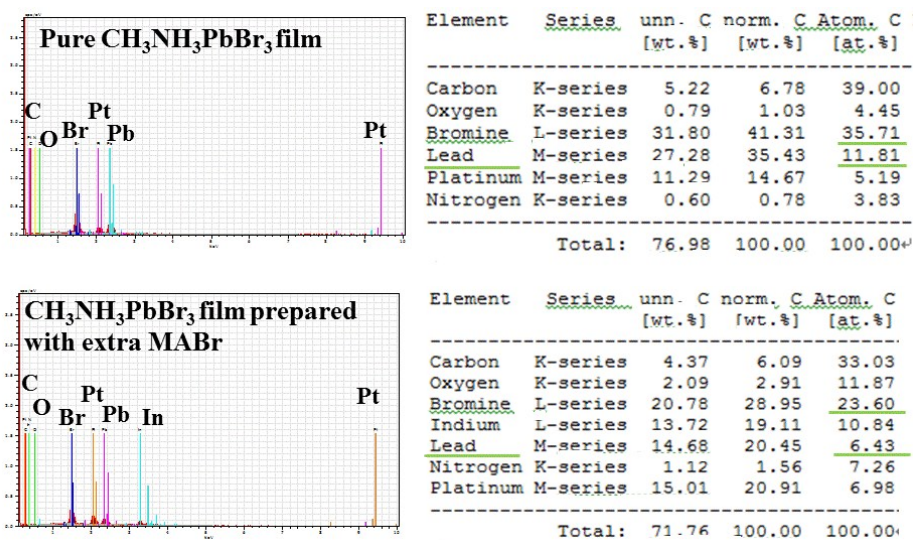

Figure S2: EDS data for pure  $\text{CH}_3\text{NH}_3\text{PbBr}_3$  film and film prepared with high MABr/IPA concentration in the second step.

The stoichiometry of Br:Pb in  $\text{CH}_3\text{NH}_3\text{PbBr}_3$  films obtained from the EDS data (displayed in Figure S2) is 3:1 for the best photovoltaic performance films synthesized with both one-step and two-step methods. The result suggests that by well-controlling the concentration and volume of MABr/IPA solution and the spin rate in the preparation step, highly pure  $\text{CH}_3\text{NH}_3\text{PbBr}_3$  film can be made also with a two-step method. No other halide was detected suggesting the perovskite contains only bromide. On the other hand when the MABr/IPA concentration is too high, extra MABr may exist or decomposed to some bromides, therefore the Br/Pb ratio is higher than 3.

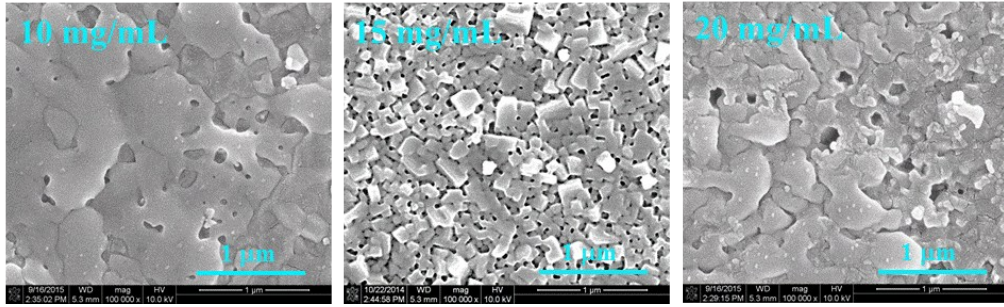

Figure S3: MAPbBr<sub>3</sub> films prepared with various concentrations of MABr/IPA solutions.

SEM images displayed in Figure S3 clearly revealed that CH<sub>3</sub>NH<sub>3</sub>PbBr<sub>3</sub> films prepared with lower or higher MABr/IPA solution all have poor quality.

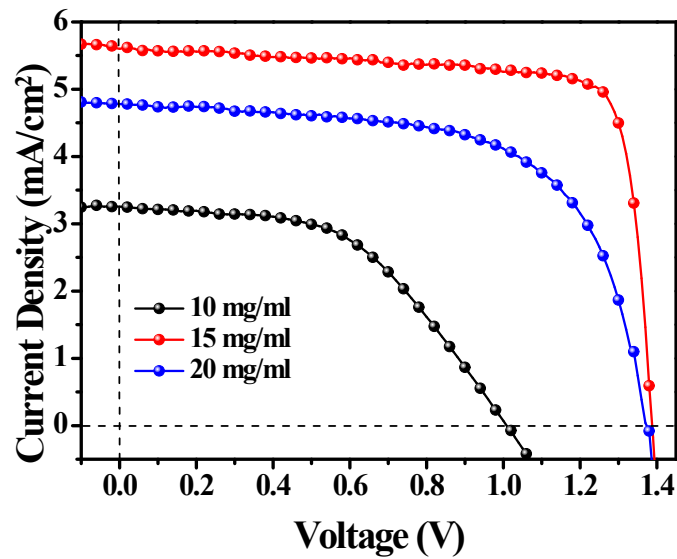

Figure S4: I-V curves of the cells based on CH<sub>3</sub>NH<sub>3</sub>PbBr<sub>3</sub> films prepared from various concentrations of MABr/IPA solutions in the second step using tow-step method.

*I-V* curves for the inverted cells based on  $\text{CH}_3\text{NH}_3\text{PbBr}_3$  films fabricated using various concentrations of MABr/IPA solutions were illustrated in Figure S3. The quality of  $\text{CH}_3\text{NH}_3\text{PbBr}_3$  film (therefore the efficiency of the corresponding device) is very sensitive to the film preparation condition. Pure  $\text{CH}_3\text{NH}_3\text{PbBr}_3$  film was obtained only in very narrow MABr/IPA concentration range. XRD and EDS data reveal that film prepared with high MABr concentration will contain unreacted MABr residue whereas  $\text{PbBr}_2$  was detected when low MABr concentration was used in the second step, all result in lower efficiency of the corresponding cells. The best photovoltaic performance  $\text{CH}_3\text{NH}_3\text{PbBr}_3$  film was obtained when the concentration and volume of MABr/IPA solution is around 15 mg/mL and 30  $\mu\text{l}$ , respectively when  $\text{PbBr}_2$  film was prepared according to the procedure reported in the experiment section.

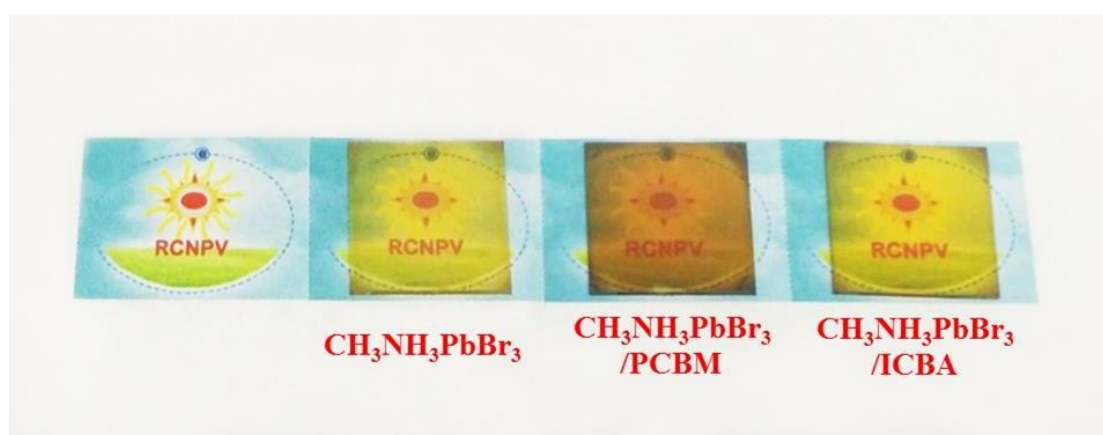

Figure S5: The pictures of blank background, ITO/PEDOT:PSS/ $\text{CH}_3\text{NH}_3\text{PbBr}_3$ , ITO/PEDOT:PSS/ $\text{CH}_3\text{NH}_3\text{PbBr}_3$ /PCBM, and ITO/PEDOT:PSS/ $\text{CH}_3\text{NH}_3\text{PbBr}_3$ /ICBA.

The photos shown in Figure S4 reveal that  $\text{CH}_3\text{NH}_3\text{PbBr}_3$  film is semi-transparent.  $\text{CH}_3\text{NH}_3\text{PbBr}_3$  film does not change the transparency when a layer of ICBA was

deposited on tit. This is also one of advantages of using ICBA as an acceptor. If transparent cathode can be developed, a semi-transparent solar cell with high open-circuit voltage can be fabricated. It has a great potential to be applied in the tandem solar cell and the display related electronic devices.

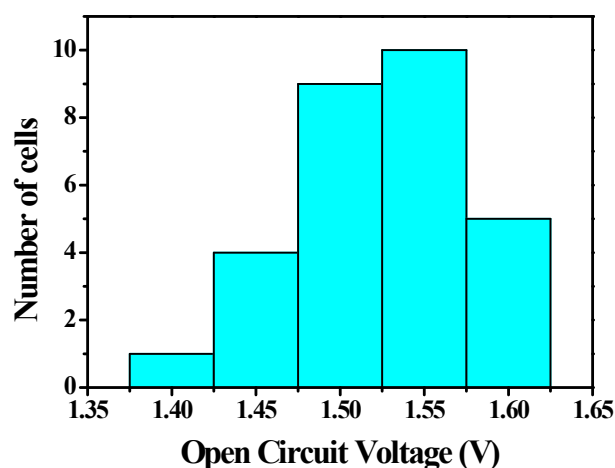

Figure S6:  $V_{oc}$  statistics (based on 29 devices) of the inverted ITO/PEDOT:PSS/ $\text{CH}_3\text{NH}_3\text{PbBr}_3$ /ICBA/Ca/Al solar cells prepared at the similar conditions.

The  $V_{oc}$  statistics (based on 29 devices) showed in Figure S5 reveals that the high open-circuit voltage is a general phenomenon observed in the inverted ITO/PEDOT:PSS/ $\text{CH}_3\text{NH}_3\text{PbBr}_3$ /ICBA/Ca/Al devices. The average  $V_{oc}$  is *ca.* 1.55 V and cell with the  $V_{oc}$  higher than 1.6 V was obtained frequently.

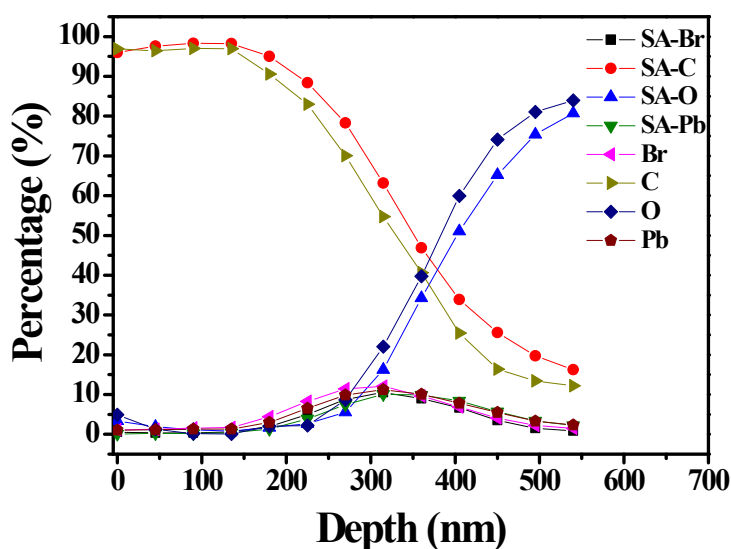

Figure S7: Depth profile XPS analysis of the contents of 4 elements of MMAPbBr<sub>3</sub>/PCBM film with (SA) and without solvent annealing..

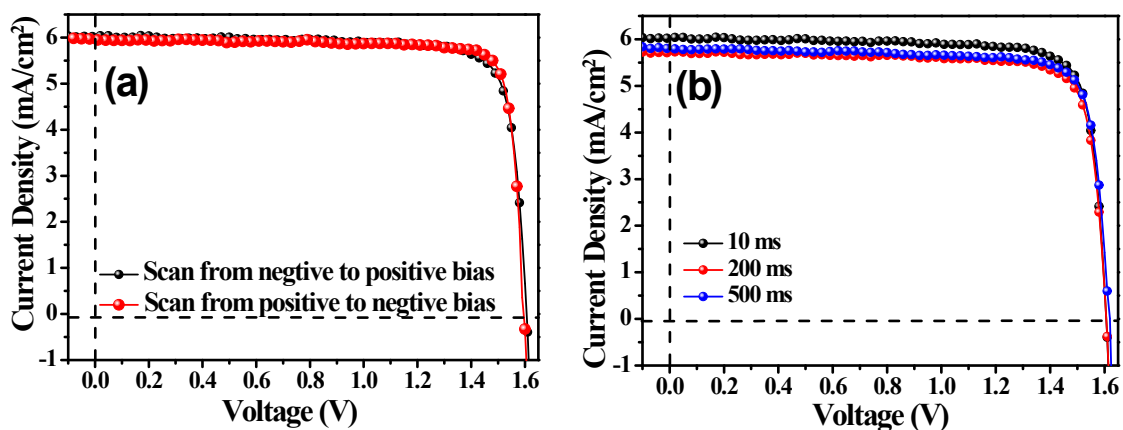

Figure S8: I-V curves of the champion cell scan at (a) two different directions and (b) various scan rates.

The I-V curves of the champion cell scan from various rates and direction displayed in Figure S7 revealed the current hysteresis is very limited.
